# Supplementary material for: Engineering gate dielectric surface properties for enhanced polymer field-effect transistor performance
Source: Royal Society of Chemistry journal article supplement (doi:10.1039/c5tc02579f), 2015-01-01
Supplement: c5tc02579f1.pdf [file c5tc02579f1.pdf]

Electronic Supplementary Information for

**Engineering Gate Dielectric Surface Properties for Enhanced  
Polymer Field-Effect Transistor Performance**

Yanlian Lei,<sup>a</sup> Bo Wu,<sup>a</sup> Wing-Kin Edward Chan,<sup>a</sup> Furong Zhu,<sup>a\*</sup> and Beng S. Ong<sup>b\*</sup>

*<sup>a</sup>Department of Physics and Institute of Advance Materials, Hong Kong Baptist University,  
Kowloon Tong, Hong Kong.*

*<sup>b</sup>Research Centre of Excellence for Organic Electronics, Institute of Creativity and Department  
of Chemistry, Hong Kong Baptist University, Kowloon Tong, Hong Kong.*

\*Correspondence authors: bong@hkbu.edu.hk (BSO), frzhu@hkbu.edu.hk (FRZ)

## Experimental Section

### *Preparation of silane-SAMs*

The silylating agents for forming silane-SAMs on SiO<sub>2</sub> surface, MTS (98%), PTS (98%) OTS-8 (97%), and OTS-18 (> 90%) were purchased from Sigma-Aldrich and used as received without further purification. Highly doped <100> p-Si wafers (SWI,  $\rho=0.001\sim 0.005$  ohm-cm) with a  $\sim 300$  nm thick thermally grown SiO<sub>2</sub> layer were used as the gate substrate, with the top SiO<sub>2</sub> layer serving as the gate dielectric. The SiO<sub>2</sub> wafer substrate was first cleaned by sonication sequentially in deionized water, acetone, and 2-propanol, followed by cleaning with UV-ozone for 5 min. For silane-SAM formation via silylation with a single silylating agent, the cleaned Si wafer substrate was immersed in a 0.1 M solution of the silylating agent in toluene at 60 °C for 20~30 min, followed by rinsing with toluene and then 2-propanol, and subsequently blowing dry with nitrogen gas. This procedure had earlier been shown to yield a chemically robust silane-SAM on SiO<sub>2</sub> surface without the need for further thermal treatment. For dual-silane “hybrid” SAM formation, the modified SiO<sub>2</sub> substrate with the first silane-SAM was again treated with a dilute solution of another silylating agent in accordance with the same silylation procedure as before, thus creating a “hybrid” silane-SAM structure composed of two silanes.

### *Device fabrication*

OFETs were fabricated in a staggered bottom-gate, top-contact configuration. Two different polymer semiconductors, mid-MW DPP-DTT (M<sub>n</sub> ~ 90K; M<sub>w</sub> ~ 299K) as previously reported<sup>3</sup> and *regio*-P3HT (98%; Rieke), were used as the channel semiconductors in the test devices. The DPP-DTT semiconductor solution was prepared in chlorobenzene at the concentration of 4 mg/mL while the *regio*-P3HT solution was prepared in chloroform at the same concentration. The channel semiconductor was prepared by spin coating the semiconductor solution on top of

bare SiO<sub>2</sub> surface (control device) or silane-SAM-modified SiO<sub>2</sub> surface at 1000 rpm, followed by annealing at an elevated temperature in an inert atmosphere. Subsequently, the gold source/drain electrode pairs were deposited on top of the semiconductor layer by vacuum thermal evaporation through a shadow mask to create OFETs with channel length ( $L$ ) and width ( $W$ ) of 80  $\mu\text{m}$  and 1500  $\mu\text{m}$ , respectively.

### *Characterization*

The wettability of the silane SAM-modified SiO<sub>2</sub> surface was determined by measuring its water contact angle using a contact angle goniometer. The contact angle was obtained by a numerical fitting algorithm using the side view of a deionized water drop. The morphology and roughness of the solution-deposited polymer semiconductor on silane-SAM-modified SiO<sub>2</sub> substrate were characterized by atomic force microscopy. Wide-angle, out-of-plane XRD measurements were carried out on a Bruker D8 Advance system (Cu X-ray source, 40 kV and 30 mA). The electrical performance of OFET devices was characterized by measuring their transfer and output characteristics using a Keithley 2636B dual-channel SourceMeter in ambient environment. The field-effect mobility in the saturation regime was extracted from the following equation:  $I_{\text{ds}} = \mu C_i (V_g - V_{\text{th}})^2 (W/2L)$ , where  $I_{\text{ds}}$  is the drain current,  $\mu$  is the field-effect mobility,  $C_i$  is the capacitance per unit area of the gate dielectric layer ( $C_i = 10 \text{ nF cm}^{-2}$ ), and  $V_g$  is gate voltage, respectively.

**Table S1**

Performance characteristics of OFET devices fabricated with DPP-DTT channel semiconductor on SiO<sub>2</sub> substrates modified with a mixture of OTS-8 and OTS-18 of different ratio.

| Mole ratio of OTS-18:OTS-8 | Average FET mobility (cm <sup>2</sup> /V·s) | On/off ratio      | Off current (nA) | S.S. (V/decade) |
|----------------------------|---------------------------------------------|-------------------|------------------|-----------------|
| 1.0:0                      | 1.89                                        | 3×10 <sup>4</sup> | 4.6              | 3.3             |
| 0.9:0.1                    | 1.87                                        | 8×10 <sup>4</sup> | 2.2              | 3.0             |
| 0.8:0.2                    | 1.79                                        | 1×10 <sup>5</sup> | 1.7              | 3.0             |
| 0.6:0.4                    | 1.41                                        | 2×10 <sup>5</sup> | 0.4              | 2.5             |
| 0:1.0                      | 0.79                                        | 5×10 <sup>5</sup> | 0.2              | 2.7             |

**Table S2**

Performance characteristics of OFET devices fabricated with regio-P3HT channel semiconductor on various silane-modified SiO<sub>2</sub> substrates.

| Silylating agents   | Average FET mobility (cm <sup>2</sup> /V·s) | On/off ratio            | Off current (nA) | S.S. (V/decade) |
|---------------------|---------------------------------------------|-------------------------|------------------|-----------------|
| Untreated           | 3.5×10 <sup>-4</sup>                        | 1×10 <sup>1</sup>       | 23               | 15              |
| PTS                 | 6.0×10 <sup>-4</sup>                        | 7×10 <sup>1</sup>       | 6                | 12              |
| OTS-8               | 0.004                                       | 1×10 <sup>3</sup>       | 2                | 5.8             |
| OTS-18              | 0.019                                       | 2×10 <sup>2</sup>       | 26               | 6.9             |
| <b>OTS-18/PTS</b>   | <b>0.014</b>                                | <b>3×10<sup>3</sup></b> | <b>3</b>         | <b>5.0</b>      |
| <b>OTS-18/OTS-8</b> | <b>0.021</b>                                | <b>5×10<sup>3</sup></b> | <b>2</b>         | <b>4.2</b>      |
